# Supplementary material
Source: HighWire-hosted journal article supplement (https://www.cmajopen.ca/highwire/filestream/81368/field_highwire_adjunct_files/0/2019-0160-1-at.pdf)
Supplement: 2019-0160-1-at.pdf [file 2019-0160-1-at.pdf]

## Appendix (as supplied by the authors)

Appendix 1: The distribution of air pollutants and their correlation to each other. Values for O<sub>3</sub>, NO<sub>2</sub>, CO, PM<sub>10</sub>, PM<sub>25</sub>, SO<sub>2</sub>, Temperature, and RH are 24-hour means. Values for ozone (O<sub>3</sub> max) are daily maximum 8-hour average.

|                          | Descriptive statistics |          |        |       | Pearson Correlation Coefficients |                    |       |       |                  |                  |                       |             | RH    | AQHI |
|--------------------------|------------------------|----------|--------|-------|----------------------------------|--------------------|-------|-------|------------------|------------------|-----------------------|-------------|-------|------|
|                          | Mean                   | Std. Dev | Median | IQR   | O <sub>3</sub>                   | O <sub>3</sub> max | NO    | CO    | PM <sub>10</sub> | PM <sub>25</sub> | SO <sub>2</sub> _mean | Temperature |       |      |
| <b>O<sub>3</sub></b>     | 20.46                  | 8.80     | 20.00  | 13.50 | 1.00                             |                    |       |       |                  |                  |                       |             |       |      |
| <b>O<sub>3</sub> max</b> | 39.48                  | 10.94    | 39.00  | 15.00 | 0.81                             | 1.00               |       |       |                  |                  |                       |             |       |      |
| <b>NO<sub>2</sub></b>    | 17.90                  | 8.95     | 18.33  | 12.33 | -0.64                            | -0.32              | 1.00  |       |                  |                  |                       |             |       |      |
| <b>CO</b>                | 0.33                   | 0.16     | 0.35   | 0.20  | -0.54                            | -0.26              | 0.80  | 1.00  |                  |                  |                       |             |       |      |
| <b>PM<sub>10</sub></b>   | 21.94                  | 12.78    | 20.00  | 16.00 | -0.12                            | 0.18               | 0.40  | 0.40  | 1.00             |                  |                       |             |       |      |
| <b>PM<sub>25</sub></b>   | 9.79                   | 5.91     | 7.00   | 6.17  | -0.02                            | 0.08               | 0.08  | 0.07  | 0.43             | 1.00             |                       |             |       |      |
| <b>SO<sub>2</sub></b>    | 1.78                   | 1.29     | 1.00   | 1.00  | -0.34                            | -0.15              | 0.53  | 0.63  | 0.24             | 0.07             | 1.00                  |             |       |      |
| <b>Temperature</b>       | 4.43                   | 10.20    | 5.08   | 14.89 | 0.41                             | 0.49               | -0.54 | -0.29 | 0.16             | 0.31             | -0.24                 | 1.00        |       |      |
| <b>RH</b>                | 64.03                  | 14.79    | 67.65  | 22.33 | -0.36                            | -0.49              | 0.02  | 0.09  | -0.23            | 0.02             | -0.05                 | -0.31       | 1.00  |      |
| <b>AQHI</b>              | 4.15                   | 0.84     | 4.13   | 1.16  | 0.05                             | 0.50               | 0.62  | 0.55  | **               | 0.43             | 0.37                  | -0.07       | -0.26 | 1.00 |

Only two observations.
